# Supplementary material for: Beyond Sector Retinitis Pigmentosa: Expanding the Phenotype and Natural History of the Rhodopsin Gene Codon 106 Mutation (Gly-to-Arg) in Autosomal Dominant Retinitis Pigmentosa
Source: MDPI journal article supplement (doi:10.3390/genes12121853), 2021-11-23
Supplement: s1 [file s1]

## Presentation

## Last Follow-up

Normal

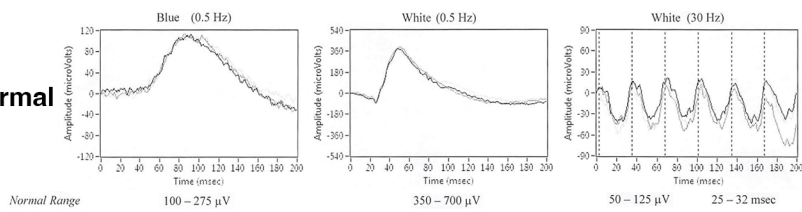

Case 1

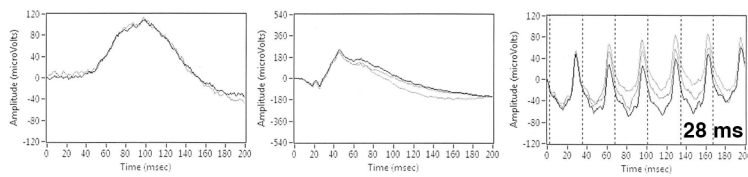

- Not Available -

Case 2

- Not Available -

Case 3

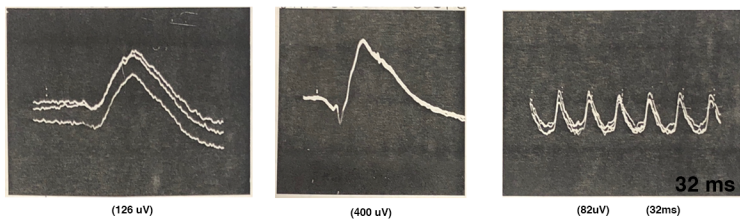

Case 4

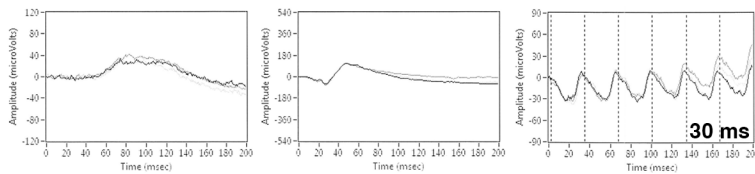

- Not Available -

Case 5

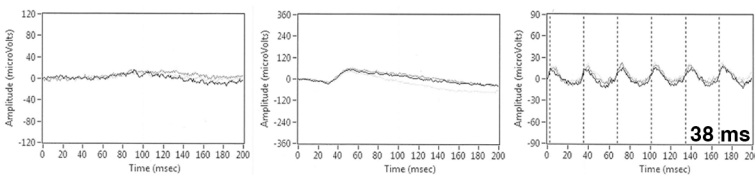

- Not Available -

Case 6

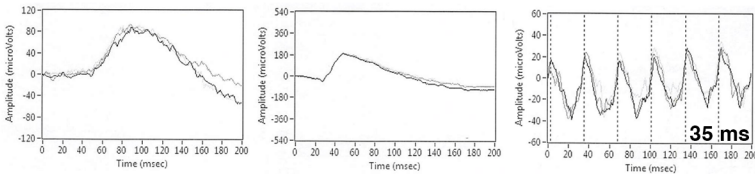

- Not Available -

Case 7

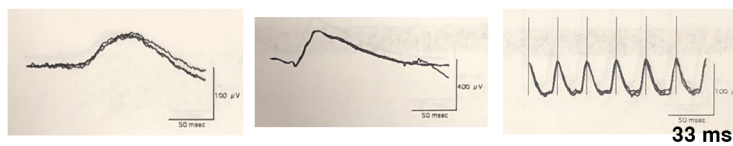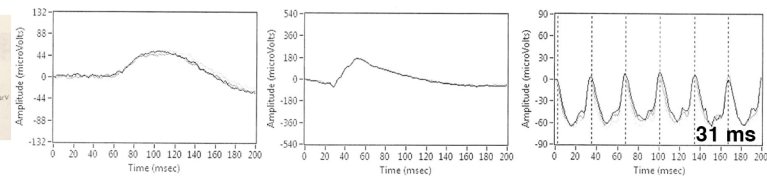

Case 8

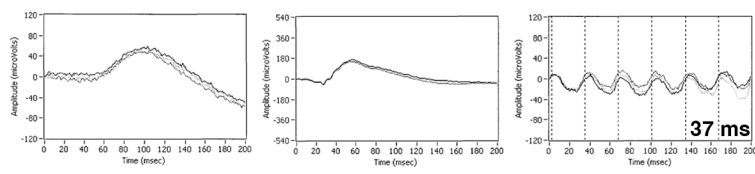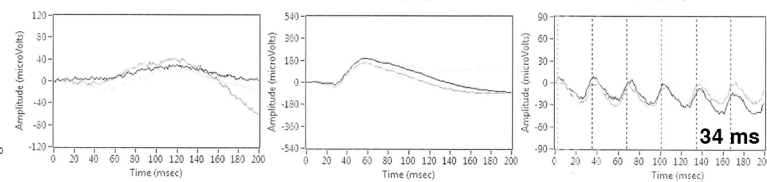

Case 9

- Not Available -
